# Supplementary material for: Abiotic and Biotic Factors from the Past as Predictors of Alien Bird Richness and Temporal Beta-Diversity
Source: MDPI journal article supplement (doi:10.3390/d15030417), 2023-03-13
Supplement: s1 [file s1]

# **Abiotic and Biotic Factors from the Past as Predictors of Alien Bird Richness and Temporal Beta-Diversity**

**Aristi Andrikou-Charitidou<sup>1</sup>, Georgios Boutsis<sup>1</sup>, Elpida Karadimou<sup>1</sup>, Mariana A. Tsianou<sup>1</sup>, Maria Lazarina<sup>1</sup> and Athanasios S. Kallimanis<sup>1\*</sup>**

<sup>1</sup> Department of Ecology, School of Biology, Aristotle University of Thessaloniki, 54124, Thessaloniki, Greece

\* Correspondence: kalliman@bio.auth.gr

**Supplementary Material**

Table S1. The 16 functional traits data set used in this study. Sources of information for each trait are: the Encyclopedia Of Life [1] (<http://www.eol.org>), the Animal Diversity Web [2] (<http://www.animaldiversity.org>) and the field guide to North American birds (Sibley 2014)[3].

| Traits                            | Type of variable | Classes                                                                                                                                                                                         |
|-----------------------------------|------------------|-------------------------------------------------------------------------------------------------------------------------------------------------------------------------------------------------|
| primary habitat                   | categorical      | arid, coastal, developed (buildings and other human constructions), forest, generalist, open (all open terrestrial habitats), open waters, riparian and wetlands, rock, semi open, shrub, urban |
| nest location                     | categorical      | ground, rock, shrub, tree                                                                                                                                                                       |
| nest type                         | categorical      | open, cavity, closed, nest parasite                                                                                                                                                             |
| foraging strategy                 | categorical      | aerial, aquatic, bark, ground, hawk, hoverer, rock, shrub, tree                                                                                                                                 |
| main diet                         | categorical      | fruit, nectar, omnivore, seed, vegetation, vertfishscav (vertebrates, fishes and scavenges)                                                                                                     |
| log-transformed body mass (grams) | quantitative     | -                                                                                                                                                                                               |
| body length (mm)                  | quantitative     | -                                                                                                                                                                                               |
| latitudinal migration             | categorical      | migrant, non-migrant                                                                                                                                                                            |
| territoriality                    | categorical      | non-territorial, territorial, occasionally colonial, colonial                                                                                                                                   |
| developmental mode                | categorical      | altricial, semi-altricial, precocial                                                                                                                                                            |
| wingspan (mm)                     | quantitative     | -                                                                                                                                                                                               |
| number of broods per year         | quantitative     | -                                                                                                                                                                                               |
| mean clutch size                  | quantitative     | -                                                                                                                                                                                               |
| mating system                     | categorical      | monogamous, polygamous                                                                                                                                                                          |
| breeding system                   | categorical      | cooperative, female only, male only, occasionally cooperative, parasitic                                                                                                                        |
| maximum lifespan                  | quantitative     | -                                                                                                                                                                                               |

[1]Encyclopedia of Life. Available from <http://eol.org>. Accessed 15 July 2018.

[2]Myers, P., R. Espinosa, C. S. Parr, T. Jones, G. S. Hammond, and T. A. Dewey. 2019.

The Animal Diversity Web (online). Available from <https://animaldiversity.org>. Accessed 15 July 2018

[3]Sibley D. A. 2014. The Sibley guide to birds, 2nd edn. Knopf, New York.

Table S2. t-test model results showing the correlations of the abiotic and biotic predictors' values between the 1980s and the 2000s.

| Predictor           | R    | p-value |
|---------------------|------|---------|
| <b>Tmax</b>         | 0.99 | <0.0001 |
| <b>PPT</b>          | 0.99 | <0.0001 |
| <b>PopDen</b>       | 0.99 | <0.0001 |
| <b>LandDiv</b>      | 0.49 | <0.0001 |
| <b>Developed</b>    | 0.97 | <0.0001 |
| <b>Agricultural</b> | 0.86 | <0.0001 |
| <b>Native SR</b>    | 0.42 | <0.0001 |
| <b>Native FDis</b>  | 0.46 | <0.0001 |
| <b>Native MPD</b>   | 0.4  | <0.0001 |
